# Supplementary material
Source: PubMed Central journal article supplement (PMC3889609)
Supplement: JB.00990-13_zjb999092939so1.pdf [file JB.00990-13_zjb999092939so1.pdf]

**Supplemental information**

**ExsA and LcrF recognize a similar consensus-binding site but differences in their oligomeric state**

**influence interactions with promoter DNA**

Jessica M. King, Sara Schesser Bartra, Greg Plano, and Timothy L. Yahr

**Table S1. Bacterial strains used in this study.**

| Bacterial strains                                  | Relevant characteristics                                                   | Reference  |
|----------------------------------------------------|----------------------------------------------------------------------------|------------|
| <i>P. aeruginosa</i> strains                       |                                                                            |            |
| PA103 <i>exsA::Ω</i>                               | chromosomal interposon insertion in <i>exsA</i>                            | (1)        |
| <i>Y. pestis</i> strains <sup>a,b</sup>            |                                                                            |            |
| KIM5-3001 (parent)                                 | Sm <sup>R</sup> , pCD1, pPCP1, pMT1                                        | (2, 3)     |
| KIM5-3001-F1( $\Delta$ <i>lcrF</i> )               | Sm <sup>R</sup> , pCD1 ( $\Delta$ <i>lcrF::dhfr</i> ), pPCP1, pMT1         | This study |
| KIM5-3233 ( <i>yopM::lacZYA</i> )                  | Sm <sup>R</sup> , pCD1 ( <i>yopM::lacZYA</i> ), pPCP1, pMT1                | (4)        |
| KIM5-3233-F2 ( $\Delta$ <i>lcrF yopM::lacZYA</i> ) | Sm <sup>R</sup> , pCD1 ( $\Delta$ <i>lcrF; yopM::lacZYA</i> ), pPCP1, pMT1 | This study |

<sup>a</sup>All *Y. pestis* strains used in this study are avirulent due to a deletion of the *pgm* locus (5).

<sup>b</sup>Plasmids native to *Y. pestis* include pCD1(6), pPCP1 (7) and pMT1 (8).

**Table S2. Primers used in this study.****Plasmid construction**

| Primer ID | Name          | Primer                                              |
|-----------|---------------|-----------------------------------------------------|
| NA        | LcrF-KpnI     | 5'-TTTGGTACCTTTAGATTTTTAGGACAGTAT                   |
| NA        | LcrF-HindIII  | 5'-TTTAAGCTTACTTTATAGTCCAAAAGTGTC                   |
| 81126789  | lcrF3'sacI    | 5'-GTCAGAGCTCATCCCGTATTTTACTTTATAGTC                |
| 81126790  | lcrF5'xbaI    | 5'-GTCATCTAGAAGGACAGTATAACATTTATGGC                 |
| 81559809  | lcrF5'Nde     | 5'-GTCACATATGGCATCACTAGAGATTATTAATTAG               |
| 82001905  | lcrF3'BamHI   | 5'-GTCAGGATCCATCCCGTATTTTACTTTATAGTC                |
| 85928866  | VxsA5'Nde     | 5'-GTGACATATGGATGTGTCAGGCCAACTAAACAC                |
| 86519886  | VxsASac-2     | 5'-GTATGAGCTCTCAATTAGCGATGGCGACTTGCTCA              |
| 88733522  | lcrF148A      | 5'-GCGTATTGAGGAATTACTGCTTGCGCTTGCCTTTAGCTCGCAAGGGAC |
| 89928045  | lcrF140Ashort | 5'-GATTTTCCGTCAGTATTAACGCAAGCGGTATTGAGGAATTAC       |

**Site-directed mutagenesis**

| Primer ID | Name           | Primer                                      |
|-----------|----------------|---------------------------------------------|
| 81126787  | lcrF(A126T)bot | 5'-CCCCTCATCTAAATCATAAGTCTGACCGCTGCTCTGCC   |
| 81126788  | lcrF(A126T)top | 5'-GGCAGAGCAGCGGTCAGACTTATGATTTAGATGAGGGG   |
| 88022425  | minictxJK511   | 5'-CTAAAACCTCGCGGCTCCCGCTACATTTTTTTAGCGTT   |
| 88022426  | minictxJK508   | 5'-CTAAAACCTCGCGGCTCCCGCTCCAATTTTTTTAGCGTT  |
| 88022427  | minictxJK510   | 5'-CTAAAACCTCGCGGCTCCCGCTACGATTTTTTTAGCGTT  |
| 88022428  | minictxJK507   | 5'-CTAAAACCTCGCGGCTCCCGCAACAATTTTTTTAGCGTT  |
| 88022429  | minictxJK506   | 5'-CTAAAACCTCGCGGCTCCCGATAACAATTTTTTTAGCGTT |
| 88022430  | minictxJK505   | 5'-CTAAAACCTCGCGGATCCCGCTACAATTTTTTTAGCGTT  |
| 88022431  | minictxJK509   | 5'-CTAAAACCTCGCGGCTCCCGCTAAAATTTTTTTAGCGTT  |
| 88022432  | minictxJK504   | 5'-CTAAAACCTCGCAGCTCCCGCTACAATTTTTTTAGCGTT  |
| 88022433  | minictxJK503   | 5'-CTAAAAGTTCGCGGCTCCCGCTACAATTTTTTTAGCGTT  |

**Promoter probes**

| Primer ID | Name        | Primer                                   |
|-----------|-------------|------------------------------------------|
| 85973161  | PyopN3'Eco  | 5'-CGACGAATTCGTATTGCCATAAGATAGGTTATG     |
| 85973164  | PyscN3'Eco  | 5'-CGACGAATTCACAATGCCATGACGAATATGATGAG   |
| 85973165  | PlcrG3'Eco  | 5'-CGACGAATTCGTTCGGCTATTGCCAGTTCTGCCTG   |
| 88203765  | PlcrG5'Hind | 5'-CGACAAGCTTAAAGTATCACAAGTCATCACCTTATC  |
| 88203767  | PyscN5'Hind | 5'-CGACAAGCTTAAATCAGCCGAGAAATTTTTAGTGCTG |

**Table S2 (continued). Primers used in this study.**

|          |              |                                                              |
|----------|--------------|--------------------------------------------------------------|
| 88203768 | PyopN5'Hind  | 5'-CGACAAGCTTGCGGGAGCCGCGAGTTTTTAGAA                         |
| 88859457 | probe4top    | 5'-AATTCCGGGGAATACCGGTCAAACCACGGCCAATCCTGATAGTACCGTGGCCAACA  |
| 88859458 | probe2top    | 5'-AATTCCGGGGAATACCTAAAAAACACGGCCAATCCTGATAGTACCGTGGCCAACA   |
| 88859460 | probe4bottom | 5'-AGCTTGTTGGCCACGGTACTATCAGGATTGGCCGTGGTTTTGACCGGTATTCCCCGG |
| 88859461 | probe6bottom | 5'-AGCTTGTTGGCCACGGTAAGATCAGGATTGGCCGTGGTTTTTTTAGGTATTCCCCGG |
| 88859462 | probe7top    | 5'-AATTCCGGGGAATACCGGTCAAACCACGGCCAATCCTGATCTTACCGTGGCCAACA  |
| 88859464 | probe7bottom | 5'-AGCTTGTTGGCCACGGTAAGATCAGGATTGGCCGTGGTTTTGACCGGTATTCCCCGG |
| 88859465 | probe2bottom | 5'-AGCTTGTTGGCCACGGTACTATCAGGATTGGCCGTGGTTTTTTTAGGTATTCCCCGG |
| 88859466 | probe6top    | 5'-AATTCCGGGGAATACCTAAAAAACACGGCCAATCCTGATCTTACCGTGGCCAACA   |

***lcrF* deletion mutant**

| <u>Primer ID</u> | <u>Name</u>  | <u>Primer sequence</u>                                           |
|------------------|--------------|------------------------------------------------------------------|
| NA               | LcrF-dhfr-P1 | 5'- TTTACAAGATGGCCTATATATTCTTTTGAAGGTCAGATATAGACGGCATGCACGATTTG  |
| NA               | LcrF-dhfr-P2 | 5'- GAAGCGACGTCGATAACTTTGAGTGAAATAAGACTGACTCGCATCCAATGTTTCCGCCAC |
| NA               | LcrF-kan-P1  | 5'- GGCATCACTAGAGATTATTAATTAGAATGGGTACACCTGTGTAGGCTGGAGCTGCTTC   |
| NA               | LcrF-kan-P2  | 5'- CGACGTCGATAACTTTGAGTGAAATAAGACTGACTCGAGCATATGAATATCCTCCTTAGT |
| NA               | LcrF-F1      | 5'- CCTCATTAGATAAATATATACAAG                                     |
| NA               | LcrF-R1      | 5'- ATCCCGTATTTTACTTTATAGTCC                                     |

**Table S3. Transcriptional reporters used in this study.**

| Reporter fusions             | Integration Plasmid                                   | Experiment           | Primer Pair       | Reference  |
|------------------------------|-------------------------------------------------------|----------------------|-------------------|------------|
| <i>P<sub>exoT-lacZ</sub></i> | mini-CTX- <i>P<sub>exoT-lacZ</sub></i> (-179 to + 17) | Fig. 1A, 4B, 10, S3C | NA                | (9)        |
| <i>P<sub>exsC-lacZ</sub></i> | mini-CTX- <i>P<sub>exsC-lacZ</sub></i> (-186 to + 17) | Fig. 1B              | NA                | (10)       |
| <i>P<sub>exsD-lacZ</sub></i> | mini-CTX- <i>P<sub>exsD-lacZ</sub></i> (-152 to + 16) | Fig. 1C              | NA                | (10)       |
| EB126                        | mini-CTX- <i>P<sub>exoT-lacZ</sub></i> (C-50G)        | Fig. 4B              | NA                | (11)       |
| EB127                        | mini-CTX- <i>P<sub>exoT-lacZ</sub></i> (C-45A)        | Fig. 4B              | NA                | (11)       |
| EB134                        | mini-CTX- <i>P<sub>exoT-lacZ</sub></i> (G-47A)        | Fig. 4B              | NA                | (11)       |
| EB135                        | mini-CTX- <i>P<sub>exoT-lacZ</sub></i> (T-38A)        | Fig. 4B              | NA                | (11)       |
| EB136                        | mini-CTX- <i>P<sub>exoT-lacZ</sub></i> (G-37C)        | Fig. 4B              | NA                | (11)       |
| JK121                        | mini-CTX- <i>P<sub>exoT-lacZ</sub></i> (C-39A)        | Fig. 4B              | NA                | (11)       |
| JK122                        | mini-CTX- <i>P<sub>exoT-lacZ</sub></i> (A-36C)        | Fig. 4B              | NA                | (11)       |
| JK123                        | mini-CTX- <i>P<sub>exoT-lacZ</sub></i> (T-35G)        | Fig. 4B              | NA                | (11)       |
| <i>P<sub>yopN-lacZ</sub></i> | mini-CTX- <i>P<sub>yopN-lacZ</sub></i>                | Fig. 7A              | 88203768-85973161 | This study |
| <i>P<sub>yscN-lacZ</sub></i> | mini-CTX- <i>P<sub>yscN-lacZ</sub></i>                | Fig. 7B, 8B          | 88203767-85973164 | This study |
| <i>P<sub>lcrG-lacZ</sub></i> | mini-CTX- <i>P<sub>lcrG-lacZ</sub></i>                | Fig. 7C              | 88203765-85973165 | This study |
| JK503                        | mini-CTX- <i>P<sub>yscN-lacZ</sub></i> (C-50G)        | Fig. 8B              | 88022433-85973164 | This study |
| JK504                        | mini-CTX- <i>P<sub>yscN-lacZ</sub></i> (G-47A)        | Fig. 8B              | 88022432-85973164 | This study |
| JK505                        | mini-CTX- <i>P<sub>yscN-lacZ</sub></i> (C-45A)        | Fig. 8B              | 88022430-85973164 | This study |
| JK506                        | mini-CTX- <i>P<sub>yscN-lacZ</sub></i> (C-39A)        | Fig. 8B              | 88022429-85973164 | This study |
| JK507                        | mini-CTX- <i>P<sub>yscN-lacZ</sub></i> (T-38A)        | Fig. 8B              | 88022428-85973164 | This study |
| JK508                        | mini-CTX- <i>P<sub>yscN-lacZ</sub></i> (A-37C)        | Fig. 8B              | 88022426-85973164 | This study |
| JK509                        | mini-CTX- <i>P<sub>yscN-lacZ</sub></i> (C-36A)        | Fig. 8B              | 88022431-85973164 | This study |
| JK510                        | mini-CTX- <i>P<sub>yscN-lacZ</sub></i> (A-35G)        | Fig. 8B              | 88022427-85973164 | This study |
| JK511                        | mini-CTX- <i>P<sub>yscN-lacZ</sub></i> (A-34T)        | Fig. 8B              | 88022425-85973164 | This study |

**Table S4. Expression plasmids used in this study.**

| Expression Plasmids                       | Experiment                          | Primer Pair                | Reference  |
|-------------------------------------------|-------------------------------------|----------------------------|------------|
| pJN105                                    | Fig. 1, 7A-C, 9A-B, S3C             | NA                         | (12)       |
| pEB124 (referred to as pExsA in the text) | Fig. 1, 4B, 7A-C, 8B, 9A-B, 10      | NA                         | (9)        |
| pBAD30-LcrF                               | NA                                  | NA                         | Plano      |
| pJK29                                     | NA                                  | 81126788-81126787          | This study |
| pJK32 (referred to as pLcrF in the text)  | Fig. 1, 4B, 7A-C, 8B, 9A-B, 10, S3C | 81126790-81126789          | This study |
| pLcrF <sub>m</sub>                        | Fig. S3C                            | NA                         | This study |
| pET16b ExsA                               | ExsA purification                   | NA                         | (9)        |
| pET16b LcrF                               | LcrF purification                   | 81559809-82001905          | This study |
| pET16b LcrF <sub>m</sub>                  | LcrF <sub>m</sub> purification      | 89928045/88733522-82001905 | This study |
| pAxsA                                     | Fig. 10                             | NA                         | (9)        |
| pPxsA                                     | Fig. 10                             | NA                         | (9)        |
| pVxsA                                     | Fig. 10                             | 85928866-86519886          | This study |

**Table S5. EMSA/DNaseI footprinting probes used in this study.**

| Probe                                   | Experiment      | Primer Pair       | Reference  |
|-----------------------------------------|-----------------|-------------------|------------|
| EMSA Probes (PCR products)              |                 |                   |            |
| <i>P<sub>exsC-lacZ</sub></i>            | Fig. 2A-B       | NA                | (10)       |
| <i>P<sub>exoT-lacZ</sub></i>            | Fig. 2C-D, 4C-D | NA                | (9)        |
| <i>P<sub>exsD-lacZ</sub></i>            | Fig. 2E-F       | NA                | (10)       |
| EB126 (C-50G)                           | Fig. 4C-D       | NA                | (11)       |
| EB134 (G-47A)                           | Fig. 4C-D       | NA                | (11)       |
| EB127 (C-45A)                           | Fig. 4C-D       | NA                | (11)       |
| JK121 (C-39A)                           | Fig. 4C-D       | NA                | (11)       |
| EB135 (T-38A)                           | Fig. 4C-D       | NA                | (11)       |
| EB136 (G-37A)                           | Fig. 4C-D       | NA                | (11)       |
| JK122 (A-36C)                           | Fig. 4C-D       | NA                | (11)       |
| JK123 (T-35G)                           | Fig. 4C-D       | NA                | (11)       |
| EB137 (A-34T)                           | Fig. 4C-D       | NA                | (3)        |
| <i>P<sub>yopN-lacZ</sub></i>            | Fig. 7D         | 88203768-85973161 | This study |
| <i>P<sub>yscN-lacZ</sub></i>            | Fig. 7E, 8B     | 88203767-85973164 | This study |
| <i>P<sub>lcrG-lacZ</sub></i>            | Fig. 7F         | 88203765-85973165 | This study |
| JK503 (C-50G)                           | Fig. 8B         | 88203767-85973164 | This study |
| JK504 (G-47A)                           | Fig. 8B         | 88203767-85973164 | This study |
| JK505 (C-45A)                           | Fig. 8B         | 88203767-85973164 | This study |
| JK506 (C-39A)                           | Fig. 8B         | 88203767-85973164 | This study |
| JK507 (T-38A)                           | Fig. 8B         | 88203767-85973164 | This study |
| JK508 (A-37C)                           | Fig. 8B         | 88203767-85973164 | This study |
| JK509 (C-36A)                           | Fig. 8B         | 88203767-85973164 | This study |
| JK510 (A-35G)                           | Fig. 8B         | 88203767-85973164 | This study |
| JK511 (A-34T)                           | Fig. 8B         | 88203767-85973164 | This study |
| EMSA Probes (annealed oligonucleotides) |                 |                   |            |
| <i>P<sub>exsC</sub></i> (50 bp)         | Fig. 3A         | NA                | (9)        |
| <i>P<sub>exsD</sub></i> (50 bp)         | Fig. 3B         | NA                | (9)        |
| <i>P<sub>exoT</sub></i> (50 bp)         | Fig. 3C, 5A     | NA                | (9)        |
| <i>P<sub>exoT</sub></i> probe 1         | Fig. 3E         | 88859458-88859465 | This study |
| <i>P<sub>exoT</sub></i> probe 2         | Fig. 3E         | 88859457-88859460 | This study |
| <i>P<sub>exoT</sub></i> probe 3         | Fig. 3E         | 88859466-88859461 | This study |
| <i>P<sub>exoT</sub></i> probe 4         | Fig. 3E         | 88859462-88859464 | This study |

**Table S5 (continued). EMSA/DNaseI footprinting probes used in this study**

|                                          |          |     |     |
|------------------------------------------|----------|-----|-----|
| pBEND fragments                          |          |     |     |
| P <sub>exsD</sub> probe 1                | Fig. 3E  | NA  | (3) |
| P <sub>exsD</sub> probe 2                | Fig. 3E  | NA  | (3) |
| P <sub>exsD</sub> probe 3                | Fig. 3E  | NA  | (3) |
| P <sub>exsD</sub> probe 4                | Fig. 3E  | NA  | (3) |
| DNaseI Footprinting Probes (PCR product) |          |     |     |
| P <sub>exsC</sub> (200bp)                | Fig. S5A | N/A | (9) |



## REFERENCES

1. **Liu PV.** 1966. The roles of various fractions of *Pseudomonas aeruginosa* in its pathogenesis. 3. Identity of the lethal toxins produced in vitro and in vivo. *J Infect Dis* **116**:481-489.
2. **Lindler LE, Klempner MS, Straley SC.** 1990. *Yersinia pestis* pH 6 antigen: genetic, biochemical, and virulence characterization of a protein involved in the pathogenesis of bubonic plague. *Infect Immun* **58**:2569-2577.
3. **Torruellas J, Jackson MW, Pennock JW, Plano GV.** 2005. The *Yersinia pestis* type III secretion needle plays a role in the regulation of Yop secretion. *Mol Microbiol* **57**:1719-1733.
4. **Leung KY, Reisner BS, Straley SC.** 1990. YopM inhibits platelet aggregation and is necessary for virulence of *Yersinia pestis* in mice. *Infect Immun* **58**:3262-3271.
5. **Ue T, Brubaker RR.** 1984. In vivo comparison of avirulent Vwa- and Pgm- or Pstr phenotypes of yersiniae. *Infection and immunity* **43**:895-900.
6. **Perry RD, Straley SC, Fetherston JD, Rose DJ, Gregor J, Blattner FR.** 1998. DNA sequencing and analysis of the low-Ca<sup>2+</sup>-response plasmid pCD1 of *Yersinia pestis* KIM5. *Infection and immunity* **66**:4611-4623.
7. **Sodeinde OA, Sample AK, Brubaker RR, Goguen JD.** 1988. Plasminogen activator/coagulase gene of *Yersinia pestis* is responsible for degradation of plasmid-encoded outer membrane proteins. *Infection and immunity* **56**:2749-2752.
8. **Protsenko OA, Anisimov PI, Mozharov OT, Konnov NP, Popov Iu A.** 1983. [Detection and characterization of the plasmids of the plague microbe which determine the synthesis of pesticin I, fraction I antigen and "mouse" toxin exotoxin]. *Genetika* **19**:1081-1090.
9. **Brutinel ED, Vakulskas CA, Brady KM, Yahr TL.** 2008. Characterization of ExsA and of ExsA-dependent promoters required for expression of the *Pseudomonas aeruginosa* type III secretion system. *Mol Microbiol* **68**:657-671.
10. **McCaw ML, Lykken GL, Singh PK, Yahr TL.** 2002. ExsD is a negative regulator of the *Pseudomonas aeruginosa* type III secretion regulon. *Mol Microbiol* **46**:1123-1133.
11. **King JM, Brutinel ED, Marsden AE, Schubot FD, Yahr TL.** 2012. Orientation of *Pseudomonas aeruginosa* ExsA monomers bound to promoter DNA and base-specific contacts with the P(exoT) promoter. *J Bacteriol* **194**:2573-2585.
12. **Newman JR, Fuqua C.** 1999. Broad-host-range expression vectors that carry the L-arabinose-inducible *Escherichia coli* araBAD promoter and the araC regulator. *Gene* **227**:197-203.

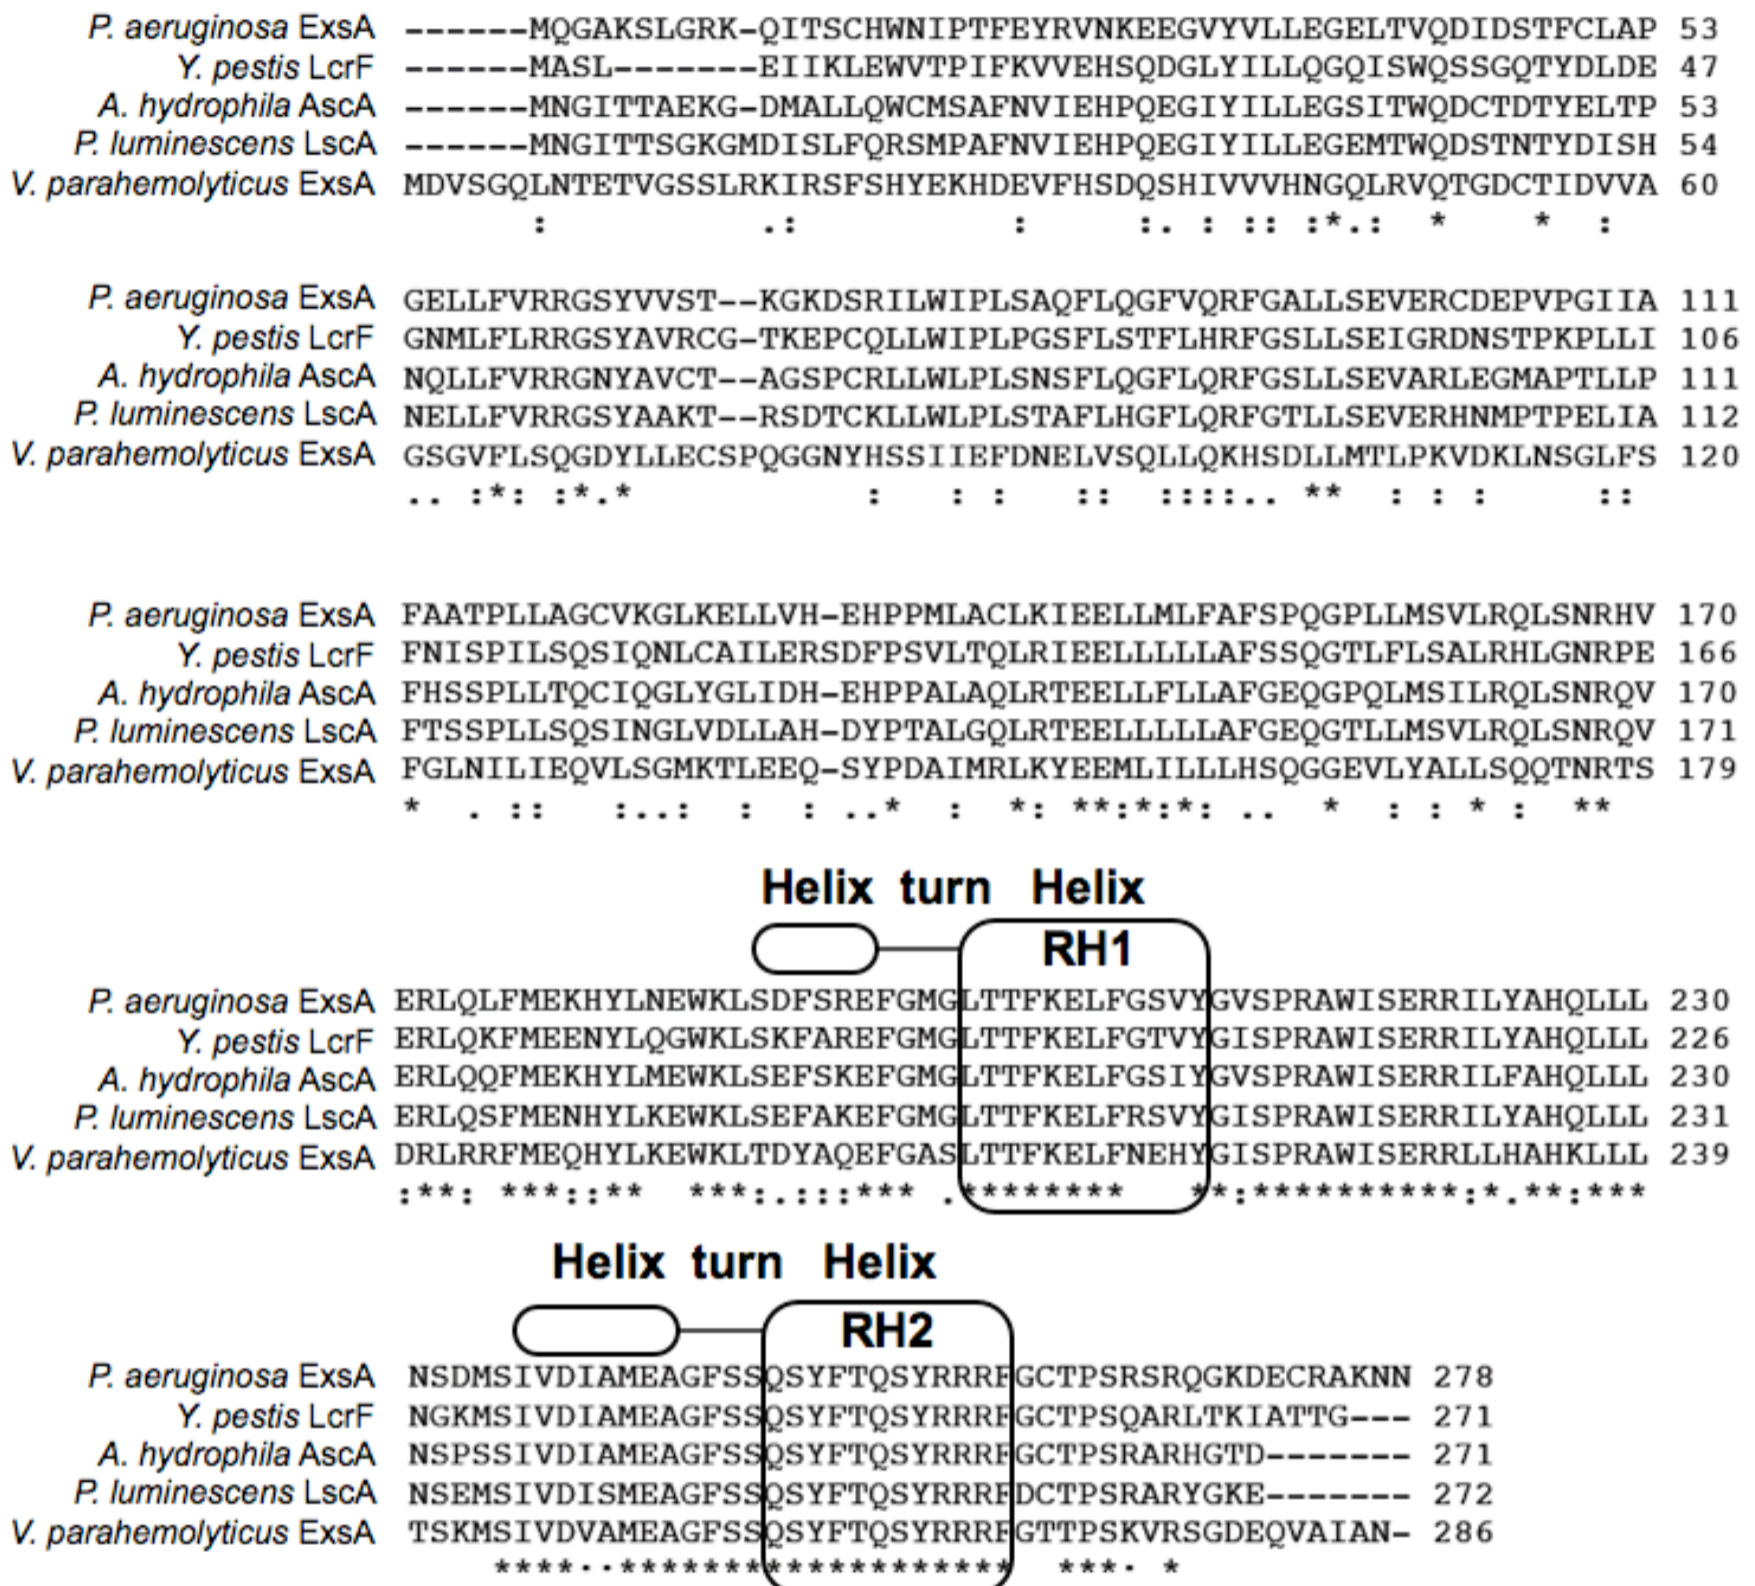

**Figure S1.** Amino acid sequence alignment of ExsA (*P. aeruginosa*), LcrF (*Y. pestis*), AxsA (*A. hydrophila*), LxsA (*P. luminescens*), and ExsA (*V. parahaemolyticus*), respectively. The recognition helices (RH1 and RH2) of the two helix-turn-helix DNA binding motifs are indicated with rounded boxes. Residues that are identical (\*), conserved (:), or similar (.) are indicated.

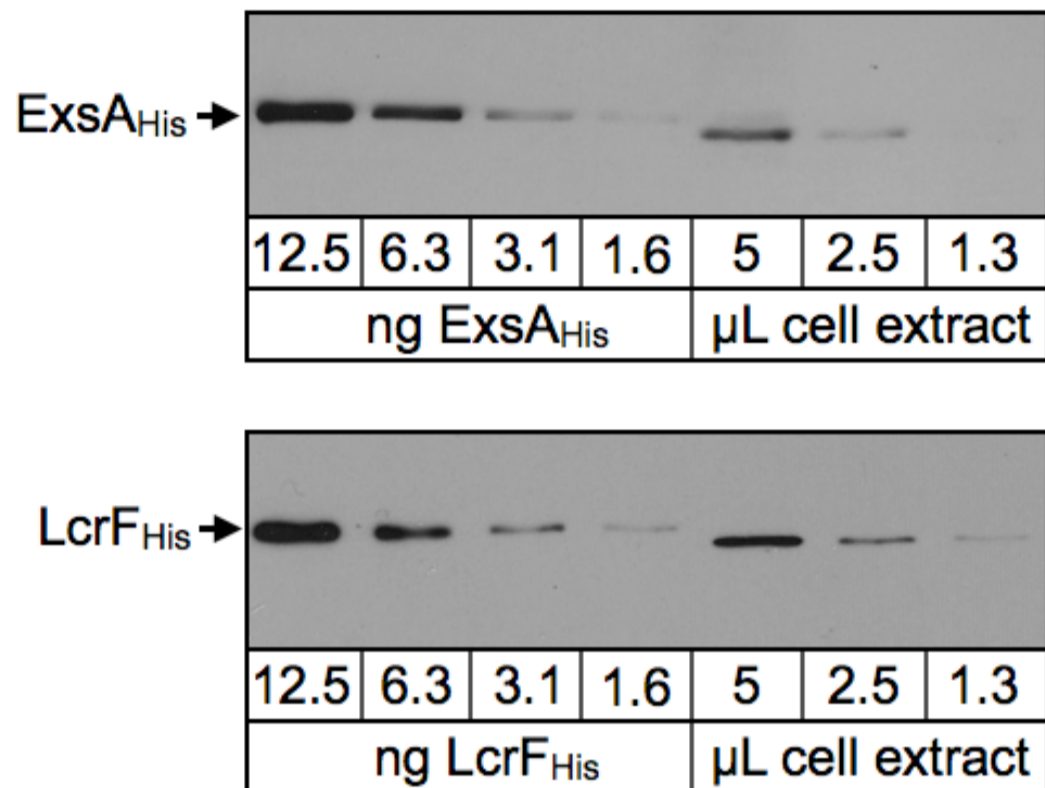

**Figure S2.** Intracellular expression levels of ExsA and LcrF are comparable. PA103 *exsA::Ω* carrying the pExsA (top panel) or pLcrF (bottom panel) expression plasmid was cultured under inducing (+ EGTA) conditions for T3SS gene expression. Cellular extracts and purified ExsA (top panel) and LcrF (bottom panel) standards were analyzed by SDS-PAGE and immunoblot analyses. ExsA and LcrF intracellular protein expression levels were estimated by comparing the amount of ExsA or LcrF in cellular extracts to the purified ExsA or LcrF standards.

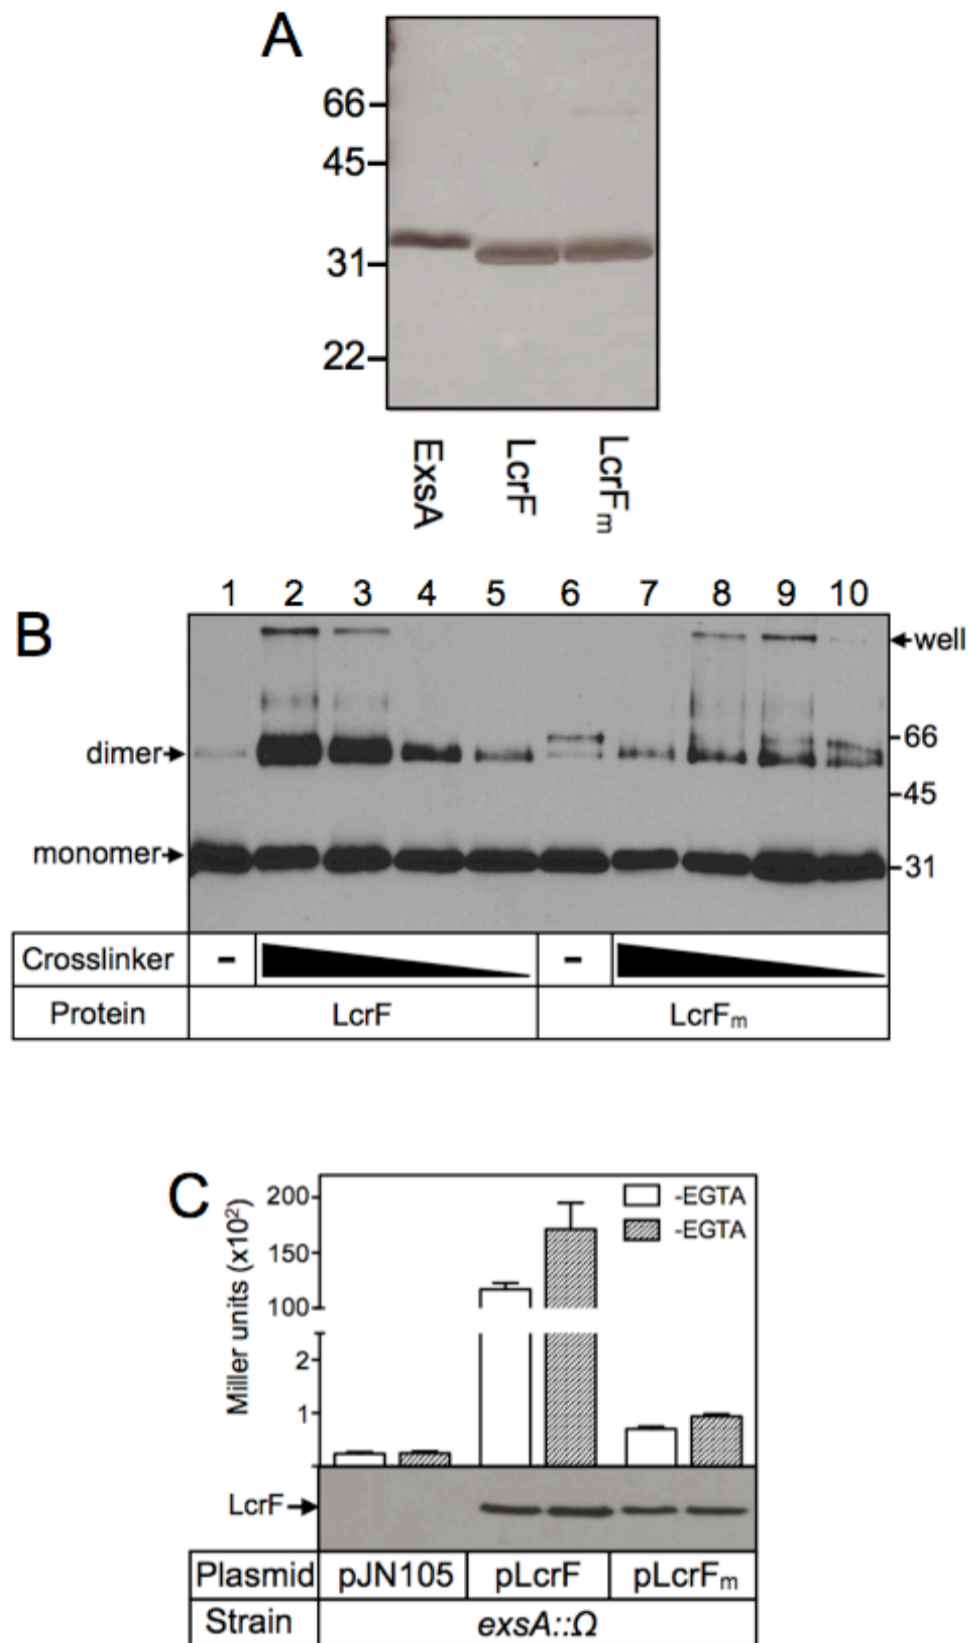

**Figure S3.** Characterization of LcrF and LcrF<sub>m</sub>. (A) Silver-stained gel of purified ExsA, LcrF, and LcrF<sub>m</sub> (1 μg each). (B) Crosslinking experiments demonstrate that purified LcrF is dimeric in solution and that LcrF<sub>m</sub> is primarily monomeric. Reactions containing 125 ng of purified LcrF (lanes 1-5) or LcrF<sub>m</sub> (lanes 6-10) were incubated in the absence (lanes 1 and 6) or presence of sulfo-EGS crosslinker (1 mg/ml [lanes 2 and 7], 0.33 mg/ml [lanes 3 and 8], 0.11 mg/ml [lanes 4 and 9], 0.033 mg/ml [lanes 5 and 10]) for 60 min at 25°C. Reactions were immediately subjected to electrophoresis on 12% SDS-polyacrylamide gels and immunoblotted for LcrF. Monomeric and dimeric species are indicated on the left side of the blot and molecular weight standards are indicated on the right side. (C) PA103 *exsA::Ω* carrying the *P<sub>exoT</sub>-lacZ* transcriptional reporter was transformed with a vector control (pJN105), pLcrF, or pLcrF<sub>m</sub>. The resulting strains were cultured under non-inducing (- EGTA) and inducing (+ EGTA) conditions for T3SS gene expression and assayed for -galactosidase activity (reported in Miller units). Whole cell extracts were immunoblotted for LcrF.

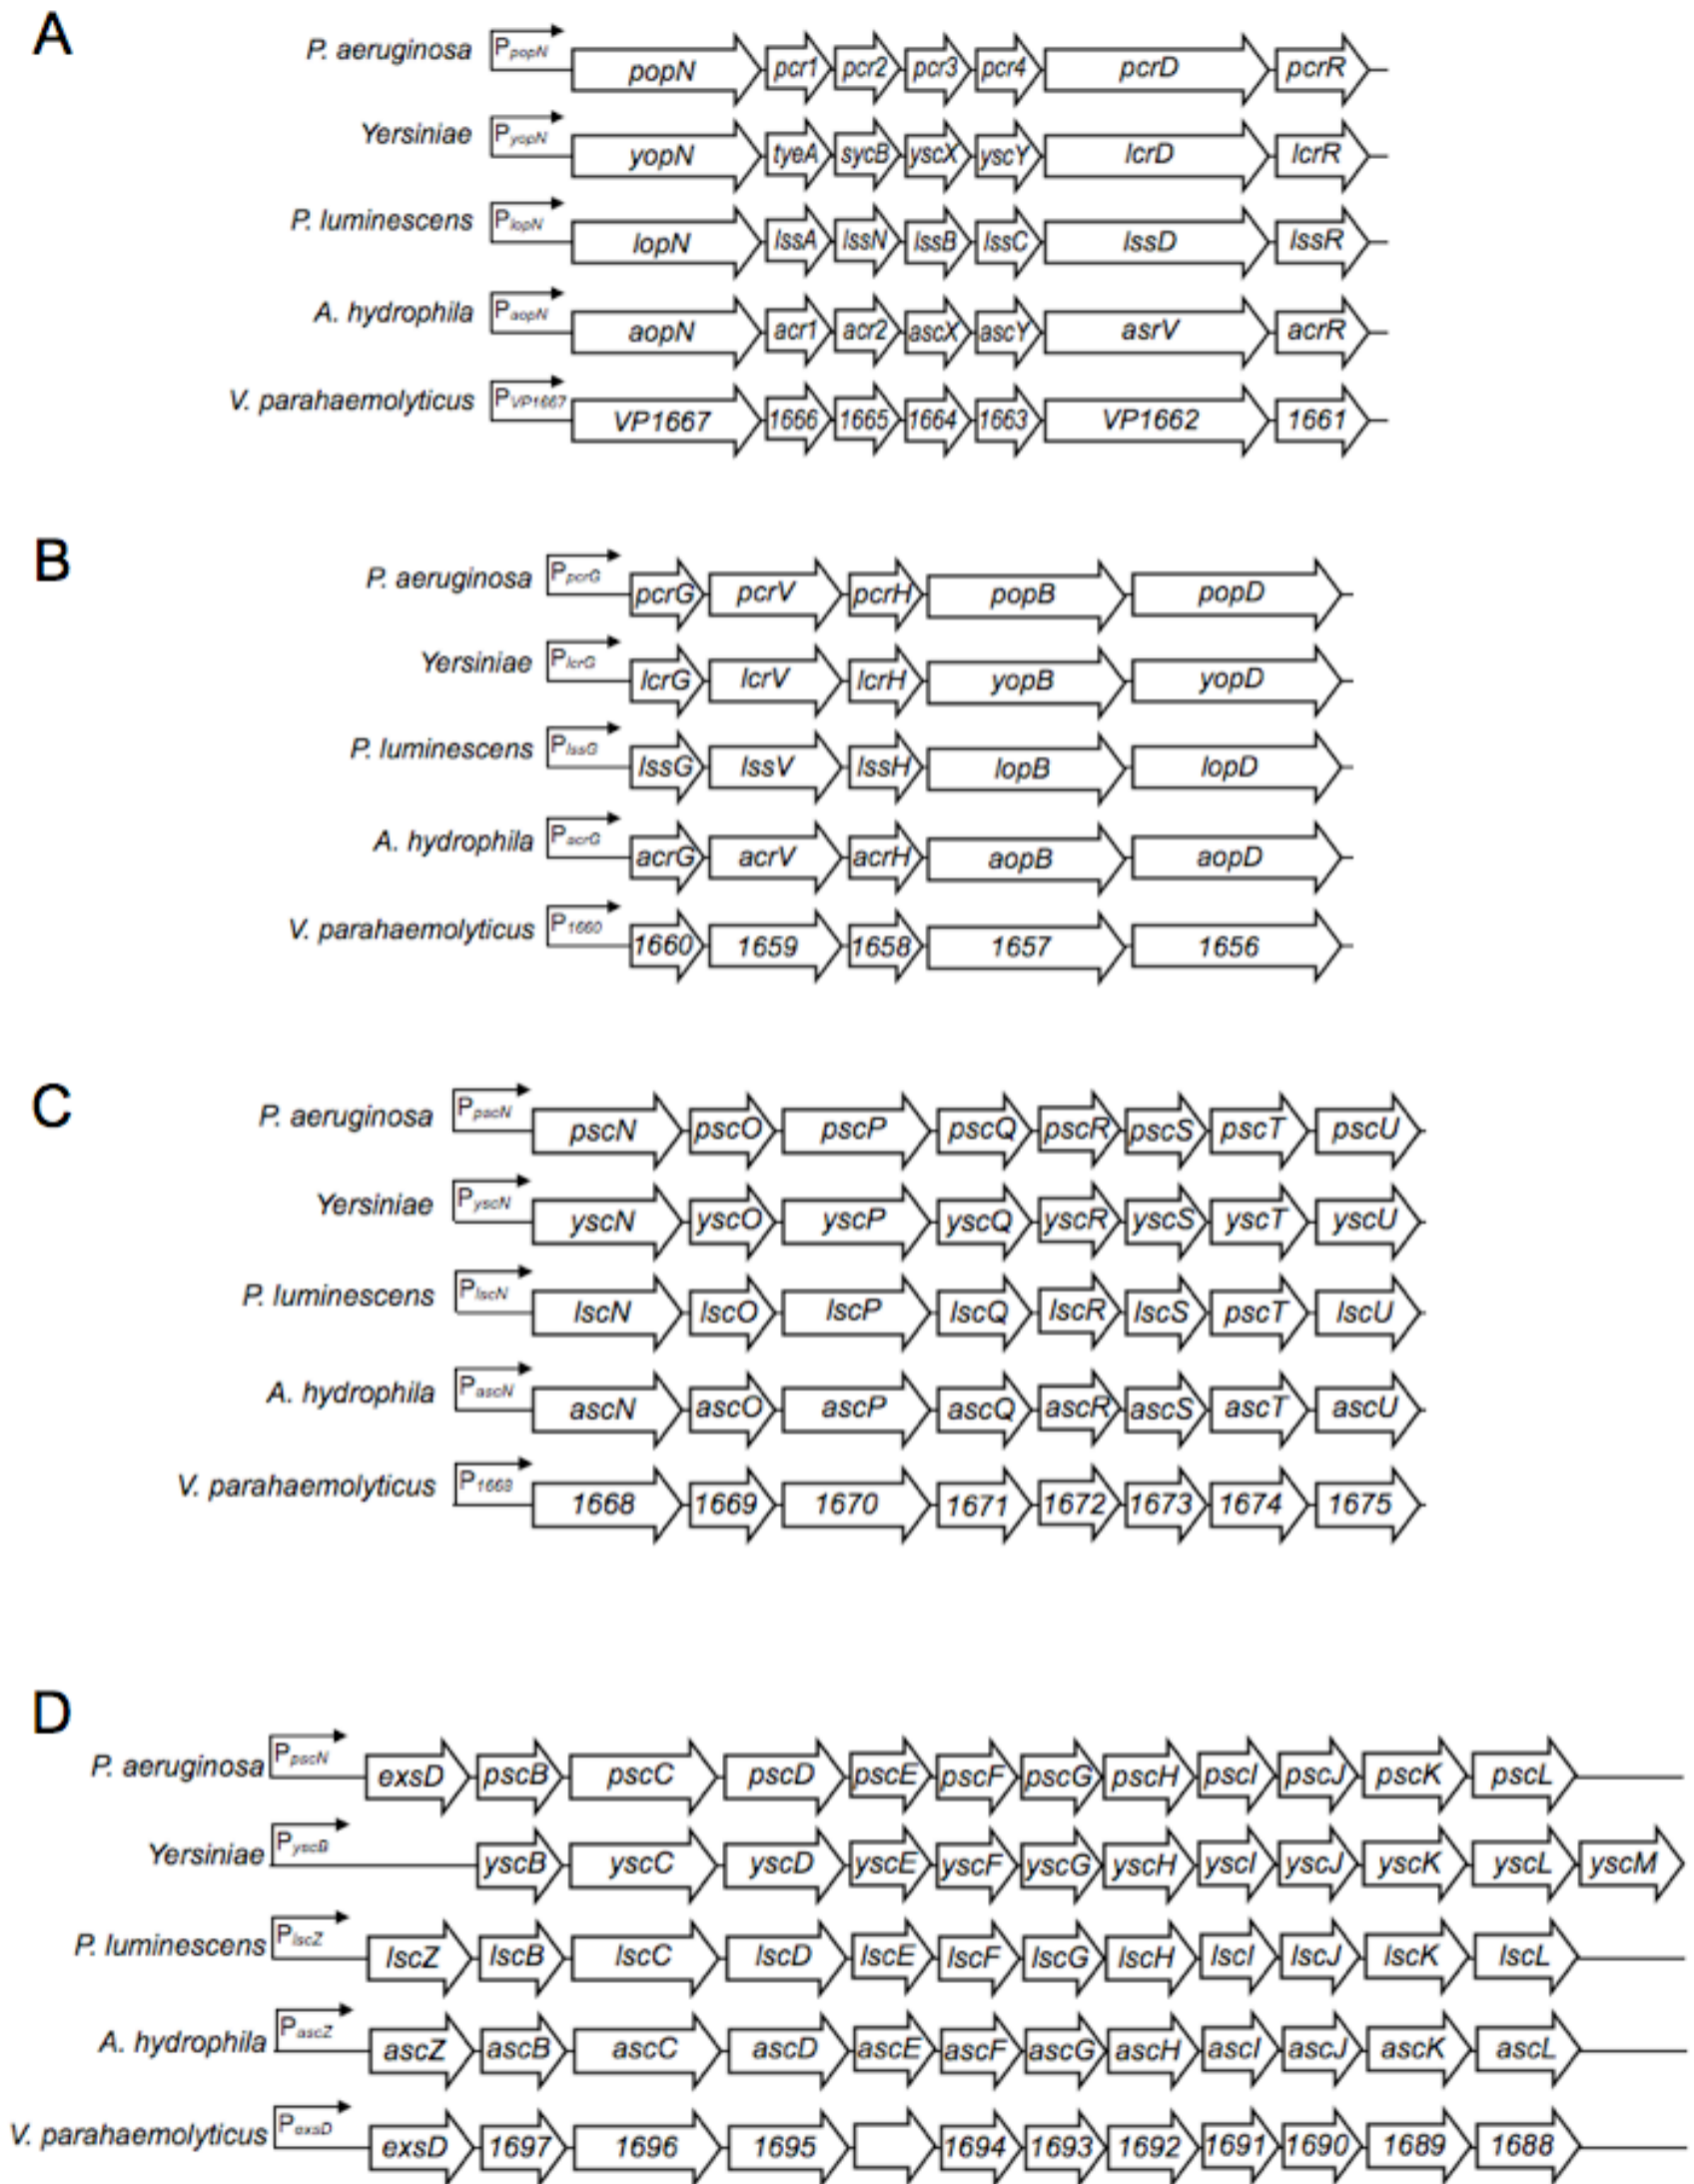

**Figure S4.** Conserved T3SS promoter regions and gene clusters in *P. aeruginosa*, *Yersinia*, *P. luminescens*, *A. hydrophila*, and *V. parahaemolyticus*.

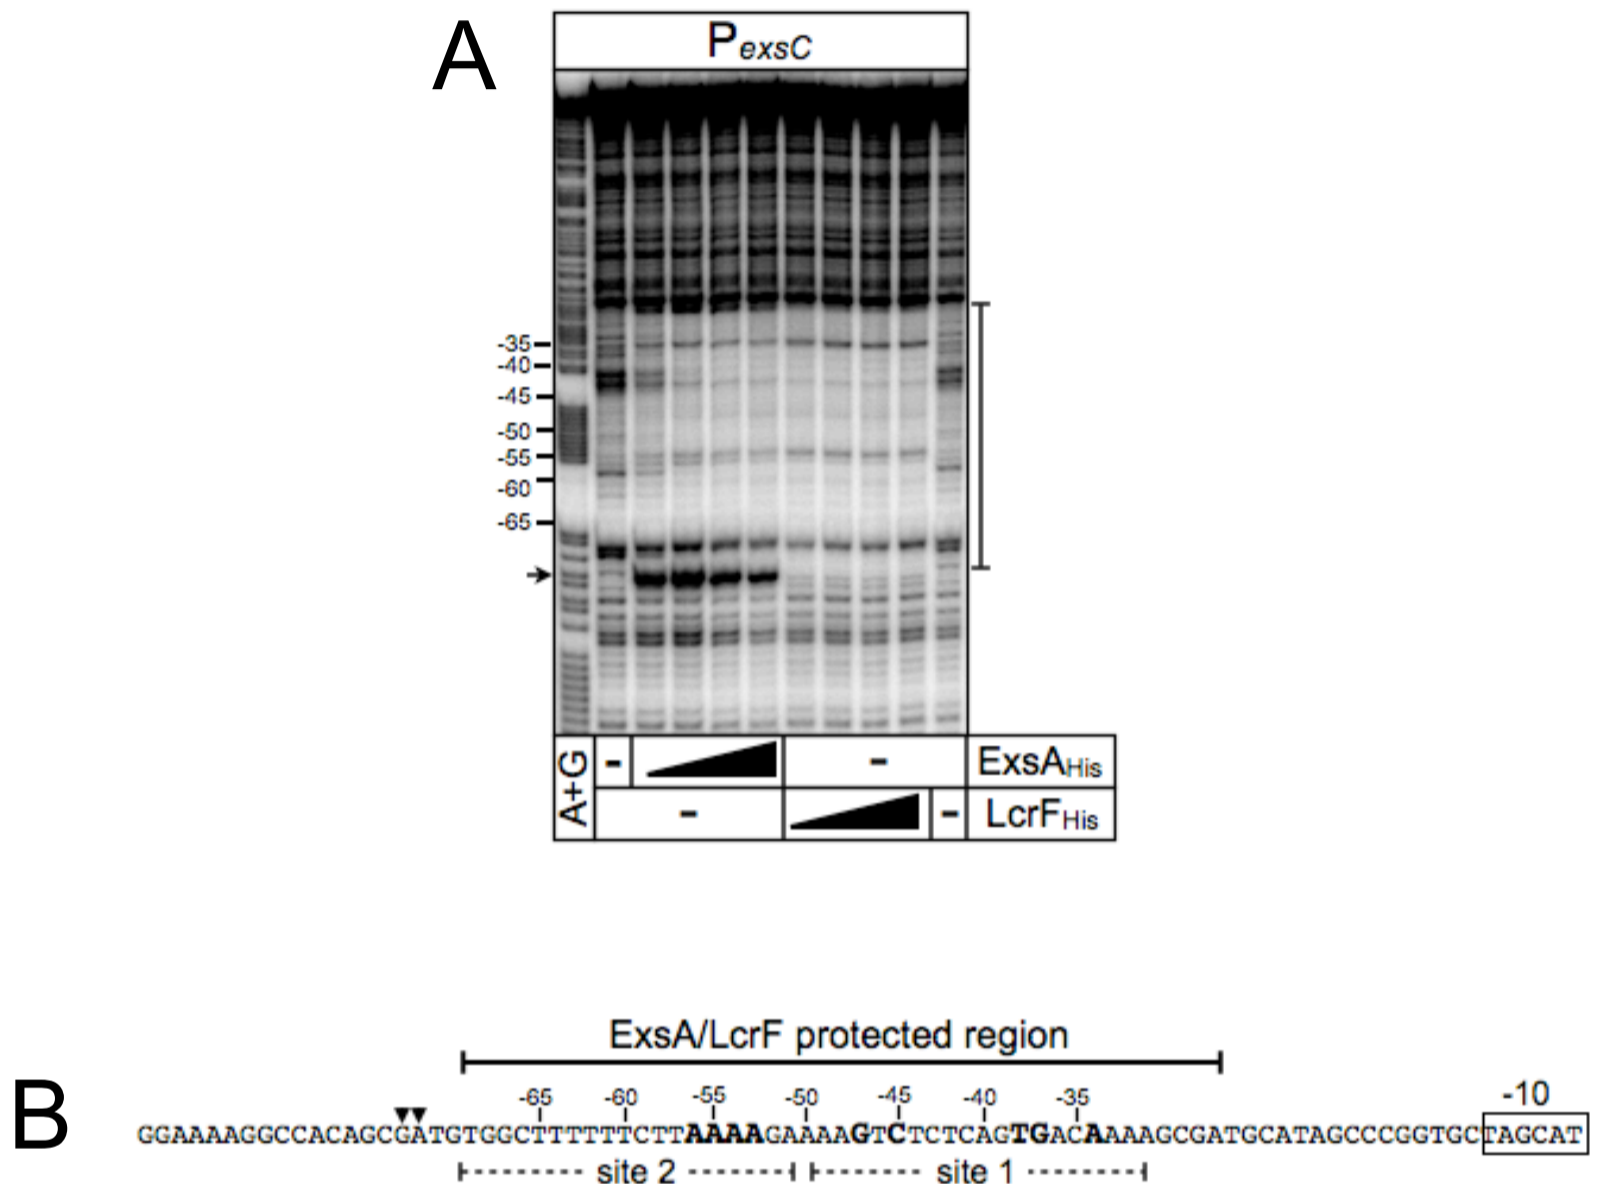

**Figure. S5.** DNase I footprinting assay. (A). Radiolabelled promoter fragments (5 nM) were incubated alone (-) or in the presence of 62.5, 125, 250, or 500 nM ExsA or LcrF for 15 min. Reactions were treated with DNase I and subjected to electrophoresis and phosphorimaging. Promoter regions protected by ExsA and LcrF from DNase I cleavage are indicated by the solid line on the right of the gel. The hypersensitive DNase I cleavage site is indicated by an arrow on the left side of the gel. Maxam–Gilbert A+G sequencing reaction, and nucleotide positions are included on the left of the gel. (B). Diagram of the  $P_{exsC}$ ,  $P_{exsD}$  and  $P_{exoT}$  promoter regions protected by ExsA and LcrF from DNase I cleavage. The solid line above the nucleotide sequence represents the ExsA- and LcrF-protected regions of the promoter DNA and the dotted line below indicates binding sites 1 and 2. Arrowheads indicate nucleotides that are hypersensitive to DNase I cleavage. The highly conserved GnC and TGnnA nucleotides, and adenine-rich region are shown in bold. The -10 promoter element is boxed.
